# Supplementary material for: Spousal Concordance of Cardiovascular Risk Factors in Newly Married Couples in China
Source: PubMed Central journal article supplement (PMC8696567; doi:10.1001/jamanetworkopen.2021.40578), 2021-12-22

## Supplemental Online Content

Retnakaran R, Wen SW, Tan H, et al. Spousal concordance of cardiovascular risk factors in newly married couples in China. *JAMA Netw Open*. 2021;4(12):e2140578.  
doi:10.1001/jamanetworkopen.2021.40578

**eFigure.** Plots Showing the Spousal Correlations of (A) Systolic Blood Pressure, (B) Diastolic Blood Pressure, (C) Total Cholesterol, (D) LDL Cholesterol, (E) HDL Cholesterol, and (F) Triglycerides, Within the 45 Couples in Which the Woman Subsequently Had Gestational Diabetes, Pre-eclampsia or Preterm Delivery

This supplemental material has been provided by the authors to give readers additional information about their work.

**eFigure:** Plots showing the spousal correlations of (A) systolic blood pressure, (B) diastolic blood pressure, (C) total cholesterol, (D) LDL cholesterol, (E) HDL cholesterol, and (F) triglycerides, within the 45 couples in which the woman subsequently had gestational diabetes, pre-eclampsia or preterm delivery

**Panel A : Systolic blood pressure**

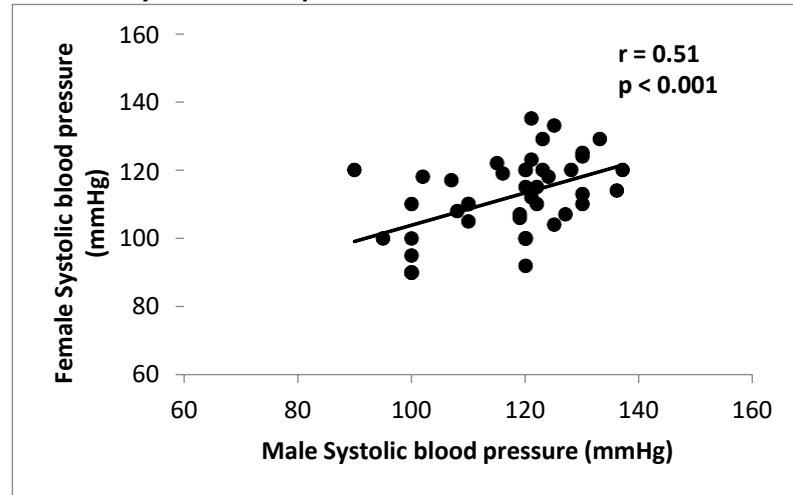

**Panel B: Diastolic blood pressure**

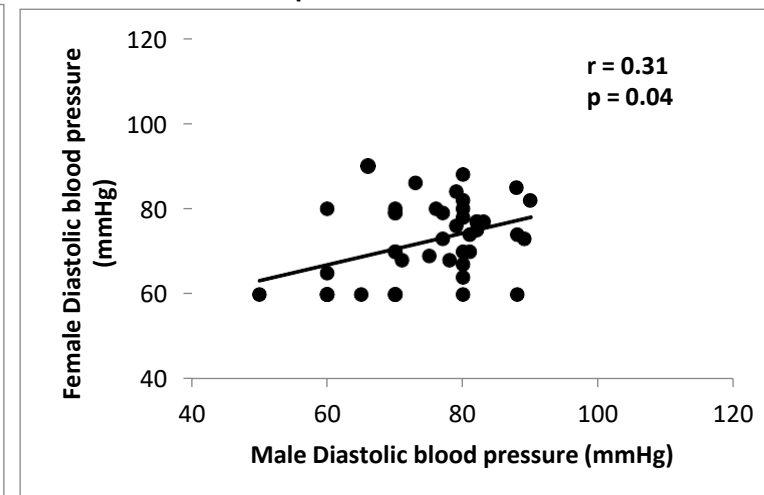

**Panel C: Total cholesterol**

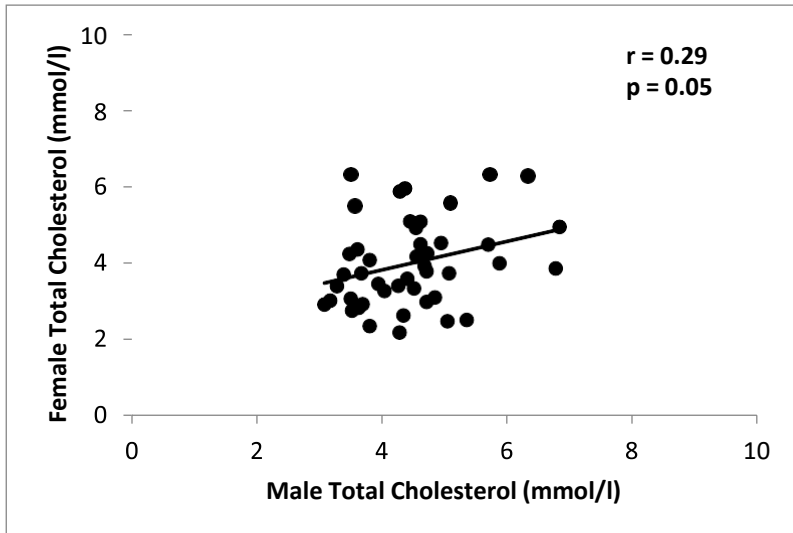

**Panel D: LDL cholesterol**

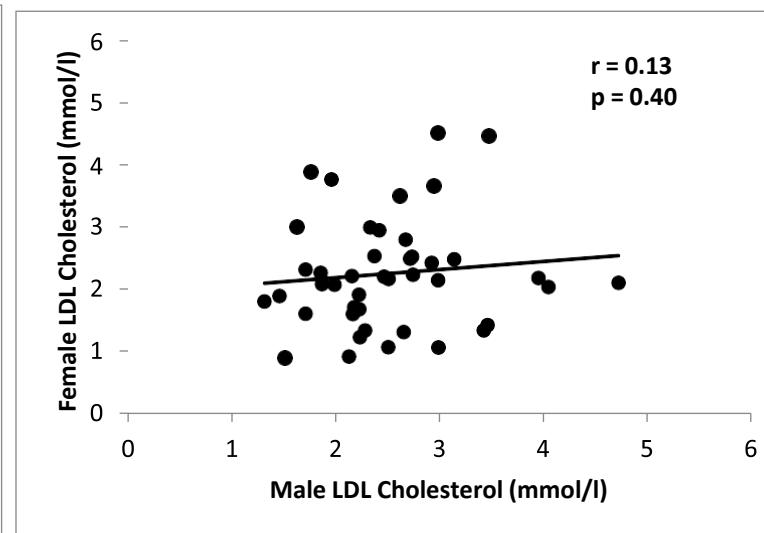

Panel E: HDL cholesterol

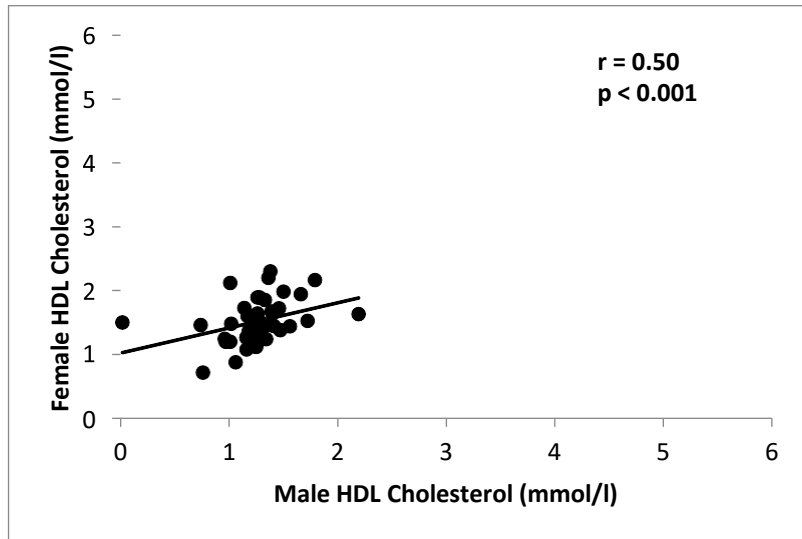

Panel F: Triglycerides

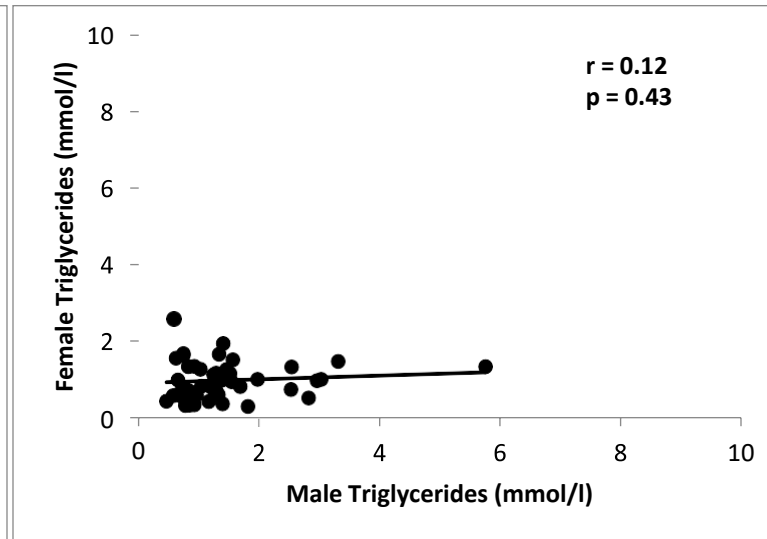

Supplement: jamanetwopen-e2140578-s001.pdf [file jamanetwopen-e2140578-s001.pdf]
